# Supplementary material for: Trajectories of Dietary Patterns, Sleep Duration, and Body Mass Index in China: A Population-Based Longitudinal Study from China Nutrition and Health Survey, 1991–2009
Source: MDPI journal article supplement (doi:10.3390/nu12082245), 2020-07-27
Supplement: s1 [file s1]

**Table S1:** Factor loadings of dietary patterns\*

| Variable            | Traditional   | Modern        |
|---------------------|---------------|---------------|
| Wheat               | <b>-0.728</b> | 0.068         |
| Rice                | <b>0.711</b>  | <b>-0.387</b> |
| Pork                | <b>0.475</b>  | <b>0.217</b>  |
| Whole grain         | <b>-0.462</b> | -0.042        |
| Fish                | <b>0.418</b>  | 0.183         |
| Poultry             | <b>0.301</b>  | <b>0.205</b>  |
| Dry tofu            | <b>0.292</b>  | 0.031         |
| Fresh vegetable     | <b>0.243</b>  | -0.195        |
| Beef                | <b>0.237</b>  | 0.161         |
| Offal               | <b>0.229</b>  | 0.035         |
| Tubers              | -0.183        | -0.113        |
| Spirit              | 0.123         | 0.110         |
| Bean thread noodle  | -0.092        | 0.064         |
| Tofu                | -0.057        | 0.055         |
| Wine                | 0.018         | 0.018         |
| Fruit               | 0.080         | <b>0.442</b>  |
| Soymilk             | -0.077        | <b>0.420</b>  |
| Eggs                | -0.031        | <b>0.418</b>  |
| Deep-fried products | <b>-0.204</b> | <b>0.408</b>  |
| Milk                | 0.047         | <b>0.399</b>  |
| Fast food           | -0.023        | <b>0.384</b>  |
| Cake                | -0.015        | <b>0.304</b>  |
| Fungus              | 0.152         | <b>0.283</b>  |
| Beer                | 0.087         | <b>0.236</b>  |
| Nuts                | 0.096         | <b>0.229</b>  |
| Shrimp              | 0.120         | <b>0.228</b>  |
| Salted vegetable    | 0.078         | <b>-0.208</b> |
| Lamb                | 0.003         | 0.199         |
| Yoghurt             | 0.037         | 0.151         |
| Others              | 0.027         | 0.116         |
| Beverage            | 0.038         | 0.109         |
| Sugar               | 0.026         | 0.103         |
| Legume              | -0.017        | -0.102        |
| Milk powder         | 0.016         | 0.056         |
| Fresh bean          | 0.008         | 0.032         |

\**bold: Factor loadings of  $>|0.20|$  represent the foods which most strongly related to the identified factor.*

**Table S2a:** Selection process for the trajectory groups of traditional dietary patterns

| Number of groups | Trajectory shapes (orders) | BIC              | Proportion of groups (%) |             |             |             |
|------------------|----------------------------|------------------|--------------------------|-------------|-------------|-------------|
|                  |                            |                  | Group 1                  | Group 2     | Group 3     | Group 4     |
| 1                | 1                          | -73111.49        | 100                      |             |             |             |
| 2                | 1 1                        | -57992.11        | 33.3                     | 66.7        |             |             |
| 3                | 1 1 1                      | -55529.93        | 18.7                     | 26.9        | 54.4        |             |
| 4                | 1 1 1 1                    | -54493.09        | 14.8                     | 21.5        | 41.3        | 22.4        |
| <b>4 *</b>       | <b>2 1 1 1</b>             | <b>-54450.03</b> | <b>15.0</b>              | <b>22.3</b> | <b>21.3</b> | <b>41.4</b> |
| 4                | 3 1 1 1                    | -54455.52        | 15.0                     | 22.3        | 21.3        | 41.4        |
| 3                | 1 1 2                      | -55528.24        | 18.7                     | 26.8        | 54.5        |             |
| 3                | 1 2 1                      | -55535.38        | 18.7                     | 26.9        | 54.4        |             |
| 3                | 1 2 2                      | -55533.29        | 18.7                     | 26.8        | 54.5        |             |
| 3                | 2 1 1                      | -55482.41        | 19.0                     | 26.8        | 54.2        |             |
| 3                | 2 1 2                      | -55480.79        | 18.9                     | 26.8        | 54.3        |             |
| 3                | 2 2 1                      | -55487.73        | 18.9                     | 26.8        | 54.3        |             |
| 3                | 2 2 2                      | -55485.91        | 18.9                     | 54.4        | 26.7        |             |

Trajectory shapes: 1 = linear; 2 = quadratic; c = cubic

BIC: Bayesian information criterion

\*Final trajectory used in the study

**Table S2b:** Selection process for the trajectory groups of modern dietary patterns

| Number of groups | Trajectory shapes (orders) | BIC              | Proportion of groups (%) |             |            |         |
|------------------|----------------------------|------------------|--------------------------|-------------|------------|---------|
|                  |                            |                  | Group 1                  | Group 2     | Group 3    | Group 4 |
| 1                | 1                          | -70456.33        | 100                      |             |            |         |
| 2                | 1 1                        | -63834.43        | 79.1                     | 20.9        |            |         |
| 3                | 1 1 1                      | -62516.73        | 68.2                     | 25.3        | 6.5        |         |
| 4                | 1 1 1 1                    | -62099.65        | 25.6                     | 2.1         | 64.8       | 7.6     |
| 3                | 1 1 2                      | -62483.09        | 68.1                     | 25.2        | 6.7        |         |
| 3                | 1 1 3                      | -62488.70        | 68.1                     | 25.2        | 6.7        |         |
| 3                | 1 2 1                      | -62435.30        | 67.8                     | 25.6        | 6.5        |         |
| 3                | 1 2 2                      | -62433.11        | 67.8                     | 25.6        | 6.6        |         |
| <b>3 *</b>       | <b>1 2 3</b>               | <b>-62430.78</b> | <b>67.7</b>              | <b>25.7</b> | <b>6.6</b> |         |
| 3                | 2 1 1                      | -62435.30        | 25.6                     | 67.8        | 6.5        |         |
| 3                | 2 1 2                      | -62433.11        | 25.6                     | 67.8        | 6.6        |         |
| 3                | 2 2 1                      | -62438.69        | 25.6                     | 67.9        | 6.5        |         |
| 3                | 2 2 2                      | -62435.71        | 67.8                     | 25.6        | 6.6        |         |

Trajectory shapes: 1 = linear; 2 = quadratic; 3= cubic

BIC: Bayesian information criterion

\*Final trajectory used in the study

**Figure S1: Marginal mean sleep duration by trajectory groups of dietary patterns\***

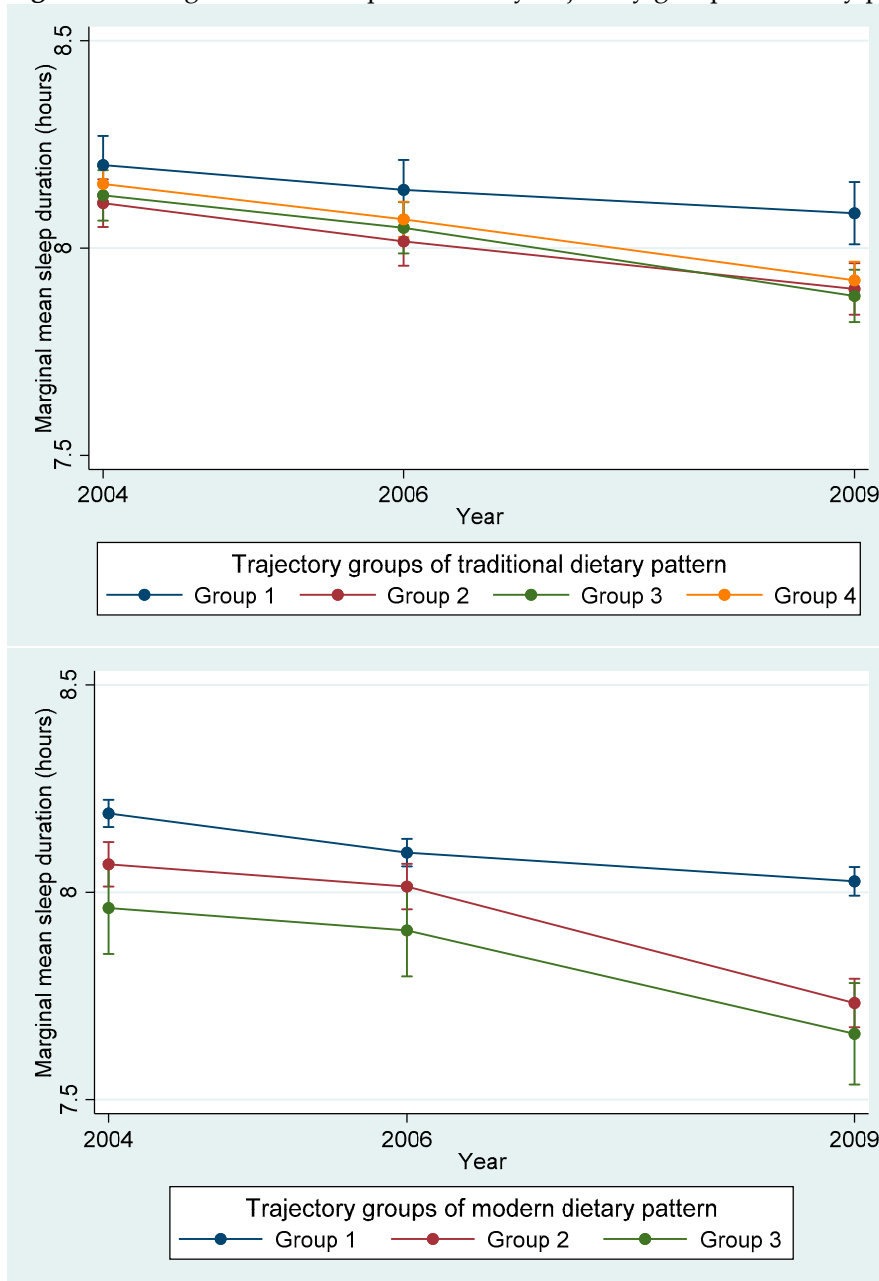

\*Values are adjusted for age and gender using mixed command in Stata. *marginsplot* command was used to generate the figure.

*Trajectory of traditional dietary patterns: Group 1 (Low and rapid increase), Group 2 (Medium and slow increase), Group 3 (High and stable), Group 4 (High and slow decrease).*

*Trajectory of modern dietary patterns: Group 1 (Low and slow increase), Group 2 (Medium and moderate increase), Group 3 (High and rapid increase).*

**Figure S2:** Marginal mean fat intake by trajectory groups of modern dietary pattern\*

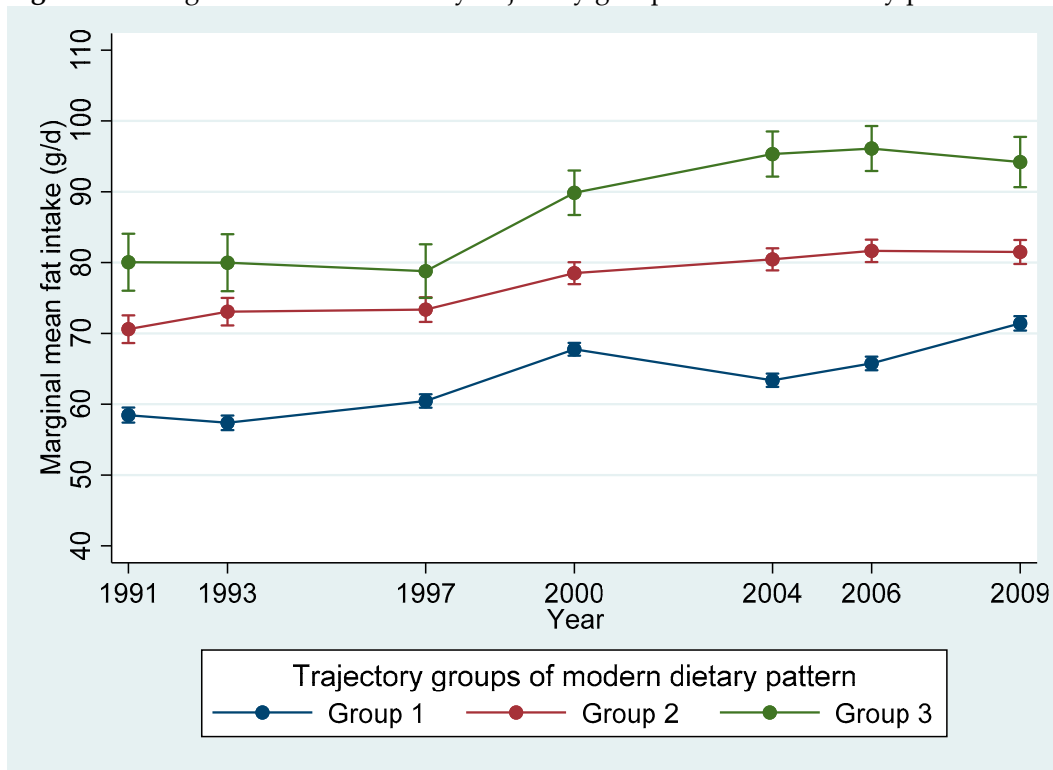

\*Values are adjusted for age and gender using mixed command in Stata. marginsplot command was used to generate the figure.

Trajectory of modern dietary patterns: Group 1 (Low and slow increase), Group 2 (Medium and moderate increase), Group 3 (High and rapid increase).

**Figure S3** Association between trajectory of dietary patterns (between 1991 and 2009) and sleep duration in 2009 by urbanization and education levels

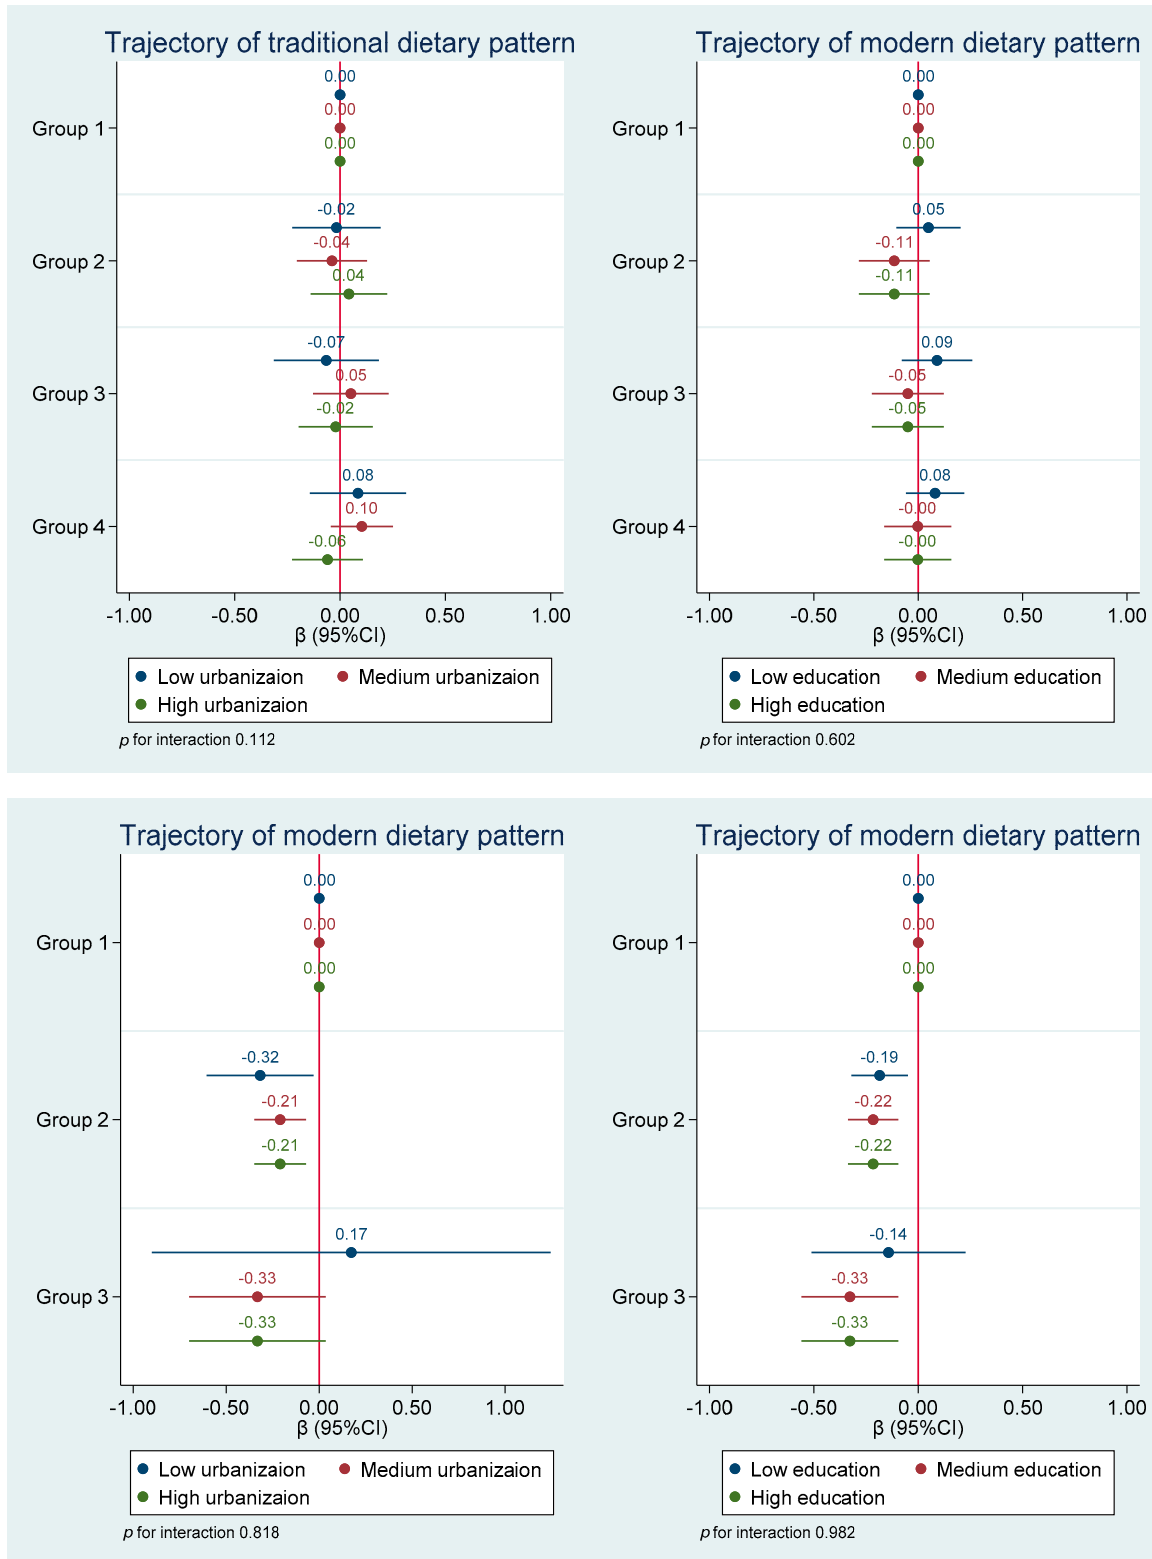

\*Model adjusted for age, sex, education, income, urbanization, smoking, alcohol drinking and physical activity and hypertension. Stratification variables were not adjusted in the corresponding models.

Trajectory of modern dietary patterns: Group 1 (Low and slow increase), Group 2(Medium and moderate increase), Group 3 (High and rapid increase).

Trajectory of modern dietary patterns: Group 1 (Low and slow increase), Group 2(Medium and moderate increase), Group 3 (High and rapid increase).

**Figure S4.** Association between trajectory of dietary patterns (between 1991 and 2009) and BMI in 2009 among non-smokers\*

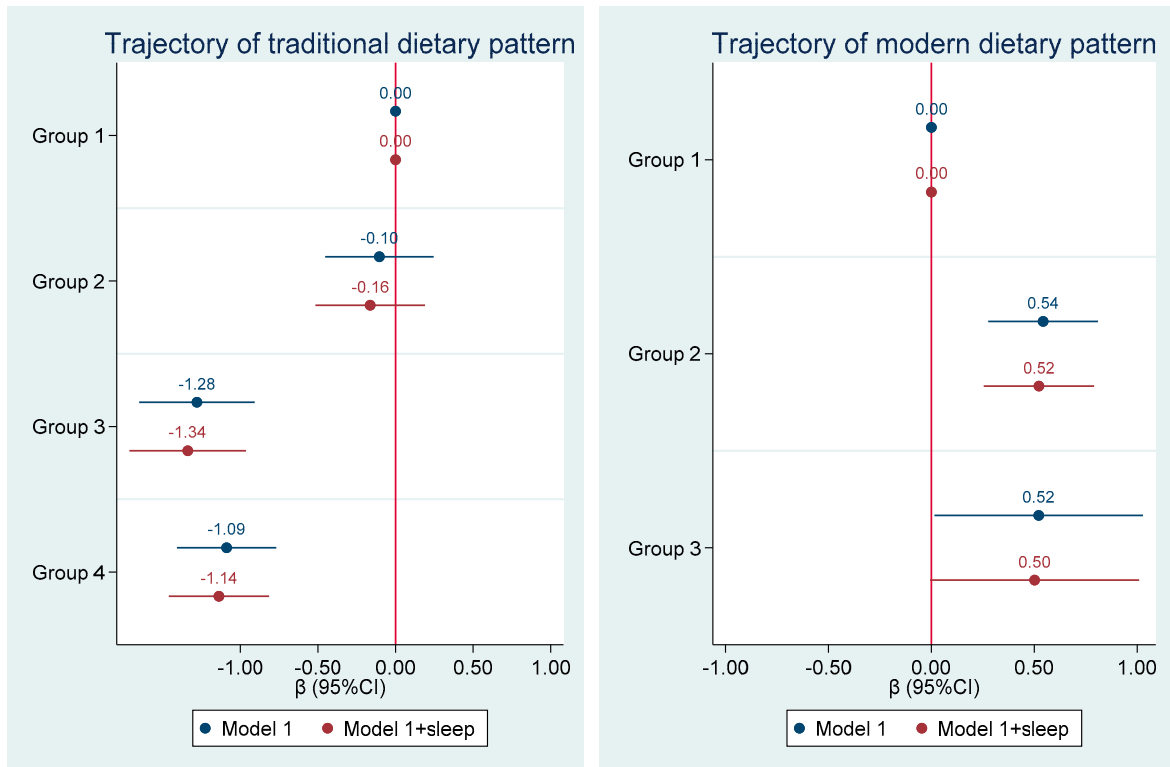

\*Model 1 adjusted for age, sex, education, income, urbanization, smoking, alcohol drinking and physical activity and hypertension.

Trajectory of traditional dietary patterns: Group 1 (Low and rapid increase), Group 2 (Medium and slow increase), Group 3 (High and stable), Group 4 (High and slow decrease).

Trajectory of modern dietary patterns: Group 1 (Low and slow increase), Group 2(Medium and moderate increase), Group 3 (High and rapid increase).
